# Supplementary figures and images for: Deficiency of T-Cell Intracellular Antigen 1 in Murine Embryonic Fibroblasts Is Associated with Changes in Mitochondrial Morphology and Respiration
Source: MDPI journal article supplement (doi:10.3390/ijms222312775), 2021-11-26

## TOMM20

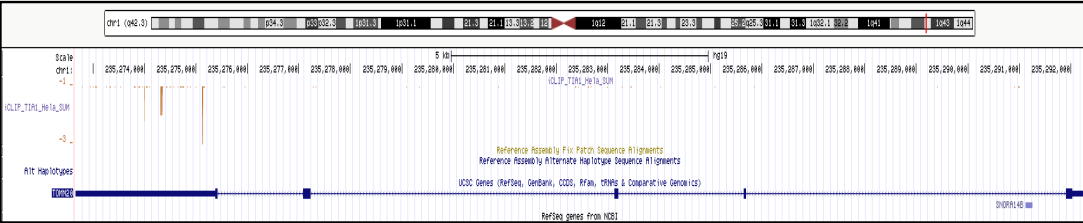

# TIMM23

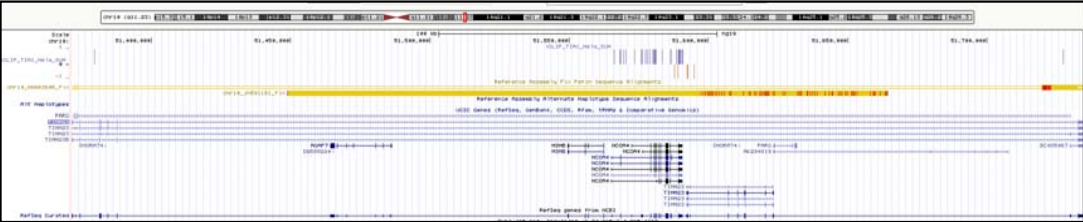

## VDAC1

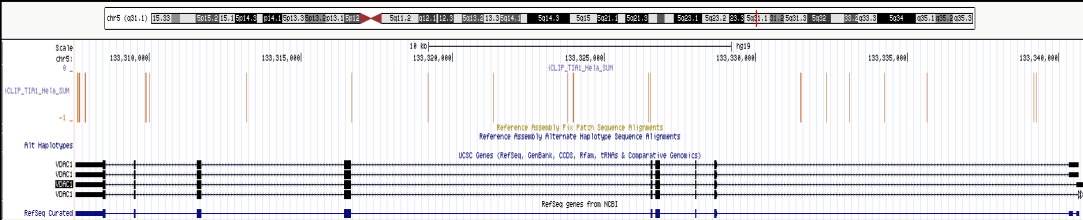

## SDHA

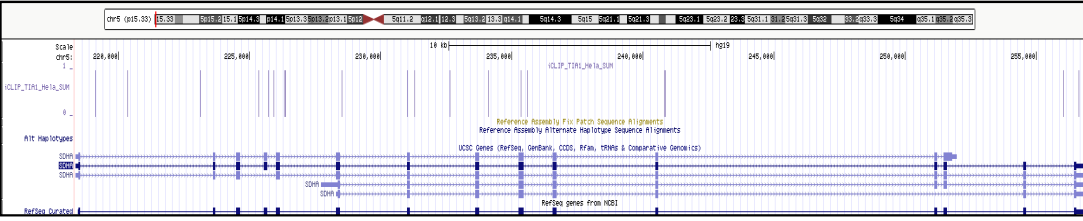

**UQCRQ**

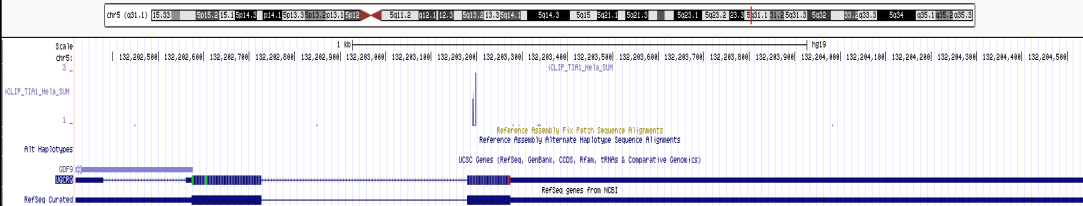

**CYCS**

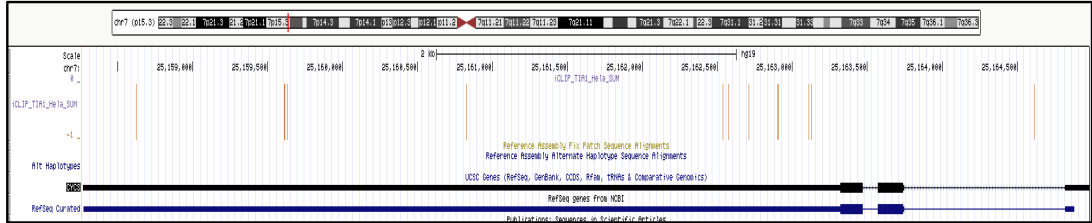

# ATP5F1A

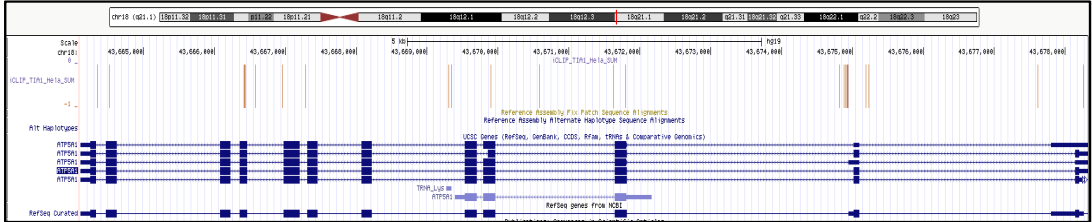

## TFAM

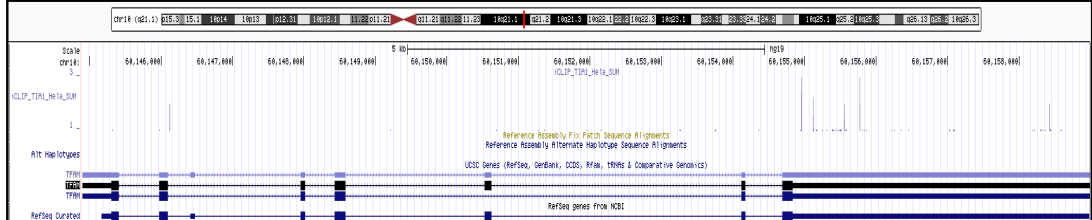

**BAX**

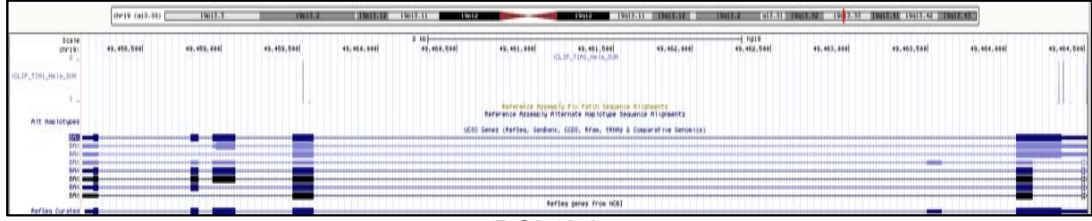

## BCL2L1

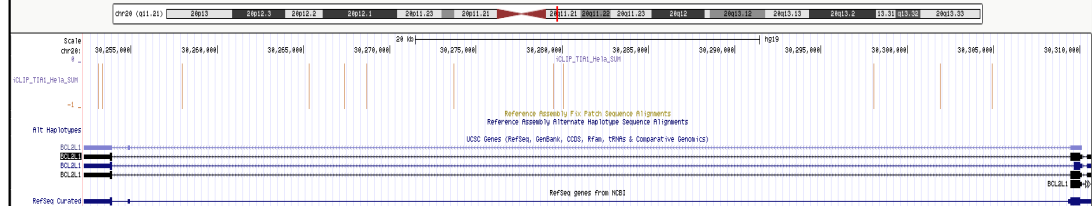

Supplement: s1 [file s1]

WB – FIGURE 3

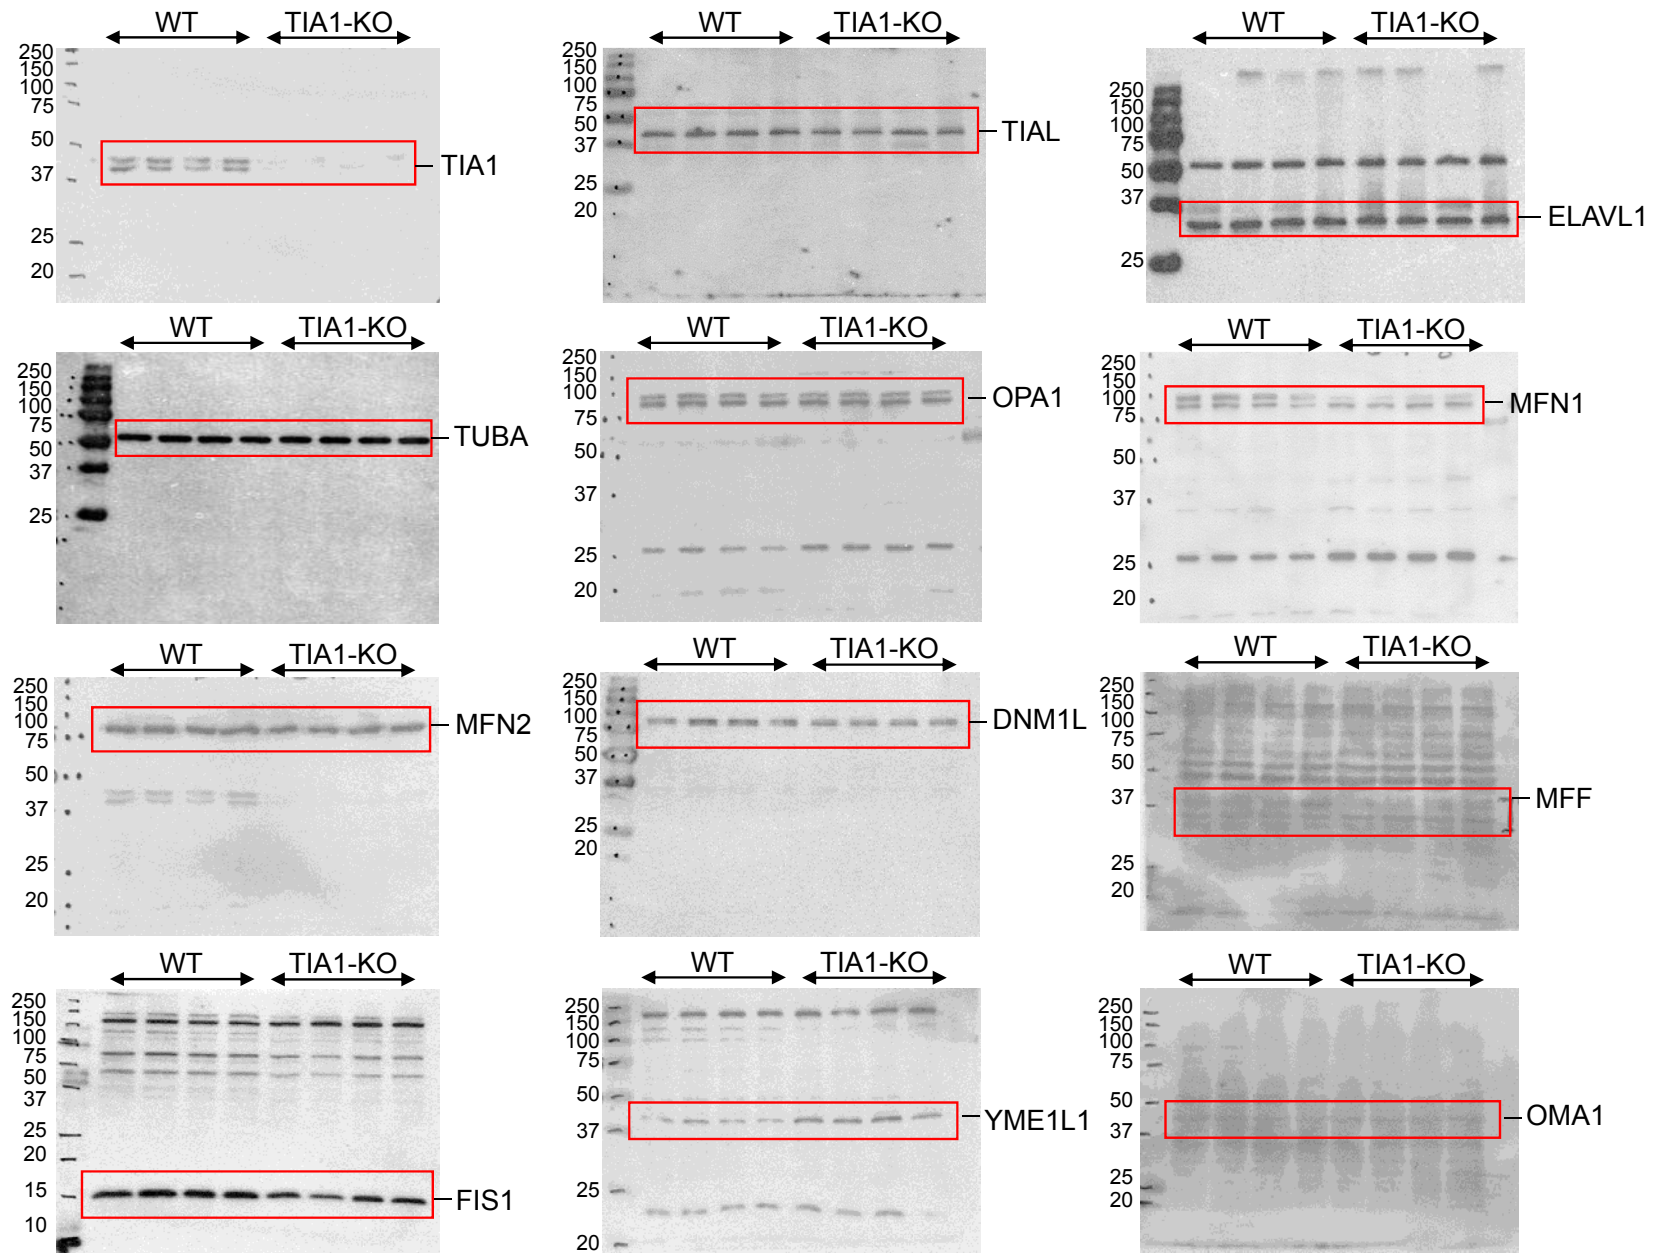

WB – FIGURE 6

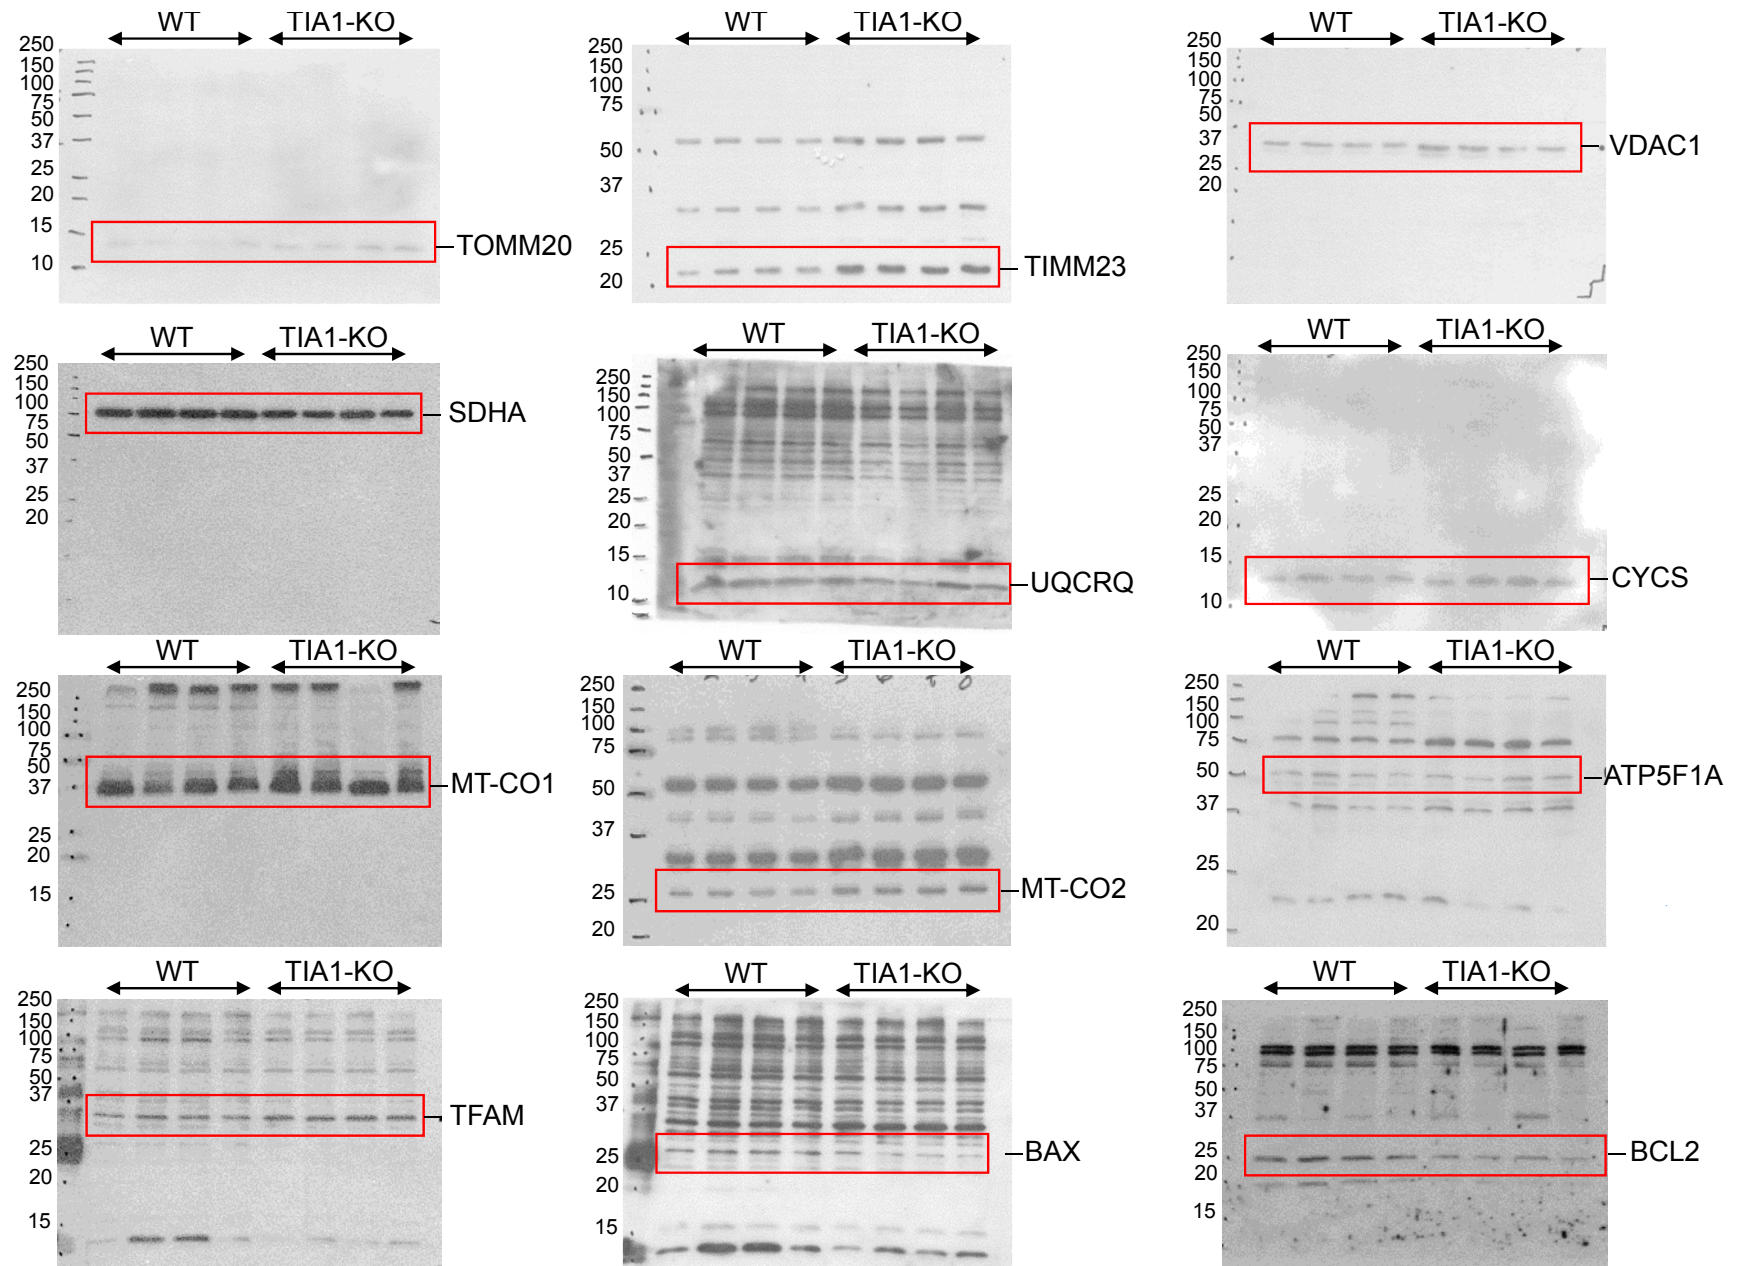

Supplement: s1 [file s1]
